# Supplementary material
Source: Springer Nature journal article supplement (https://www.springermedizin.de/resource/supplementary/12950_2010_169_MOESM4_ESM.pdf/9558120)

# A: Acute Challenge Response to MSC

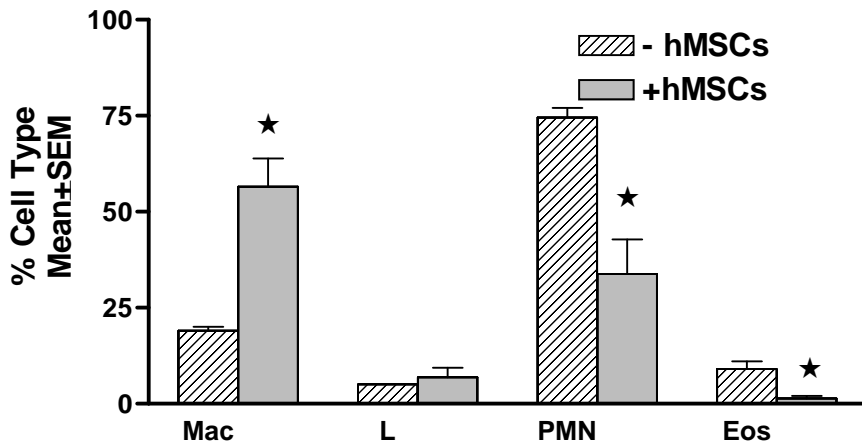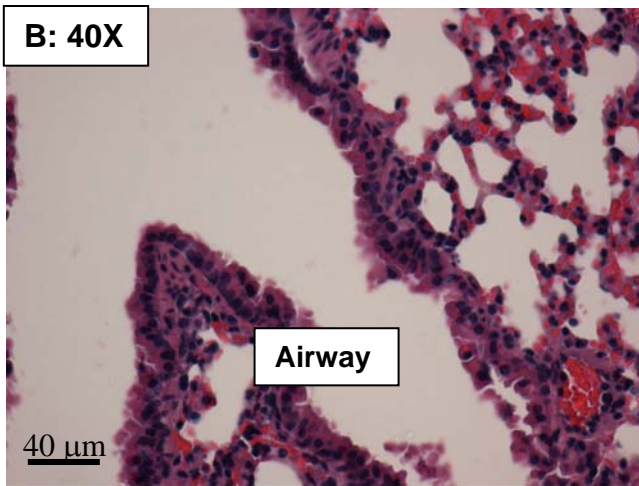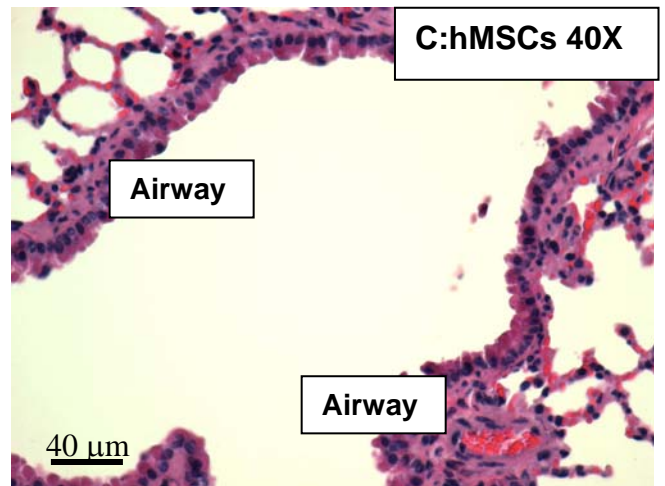

# D: Correlation of Cube Score and Cellular Recruitment

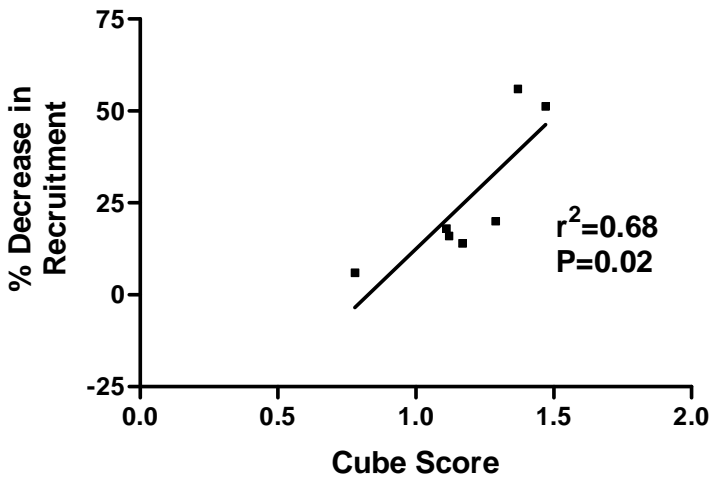

Supplement: MOESM4 [file 9558120]
